# Supplementary material for: Targeting of SLC25A22 boosts the immunotherapeutic response in KRAS-mutant colorectal cancer
Source: PubMed Central journal article supplement (PMC10403583; doi:10.1038/s41467-023-39571-6), 2023-08-04
Supplement: 41467_2023_39571_MOESM1_ESM.pdf [file 41467_2023_39571_MOESM1_ESM.pdf]

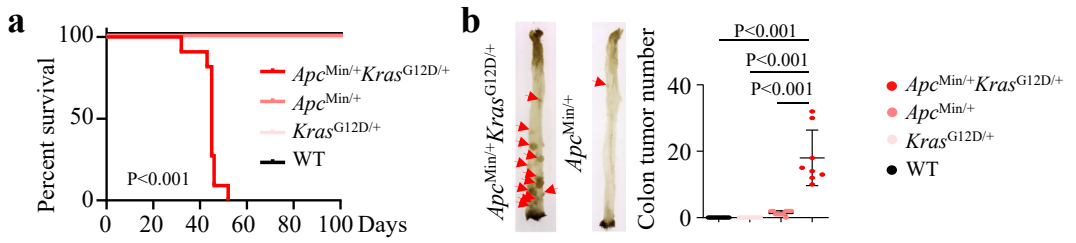

**Fig. S1.  $Apc^{Min}$  and  $Kras^{G12D}$  promoted colonic tumorigenesis in mice.** (a)  $Apc^{Min/+}Kras^{G12D/+}$ Villin-Cre mice (n=8) had reduced survival and (b) increased tumorigenesis compared to wildtype (n=10),  $Apc^{Min/+}$  (n=10) and  $Kras^{G12D/+}$ Villin-Cre mice (n=10). Data are presented as means  $\pm$  SEM for growth curve (a) and  $\pm$  SD for tumor number (b). Two-tailed two-way ANOVA for growth curve comparison (a). Two-tailed one-way ANOVA (b).

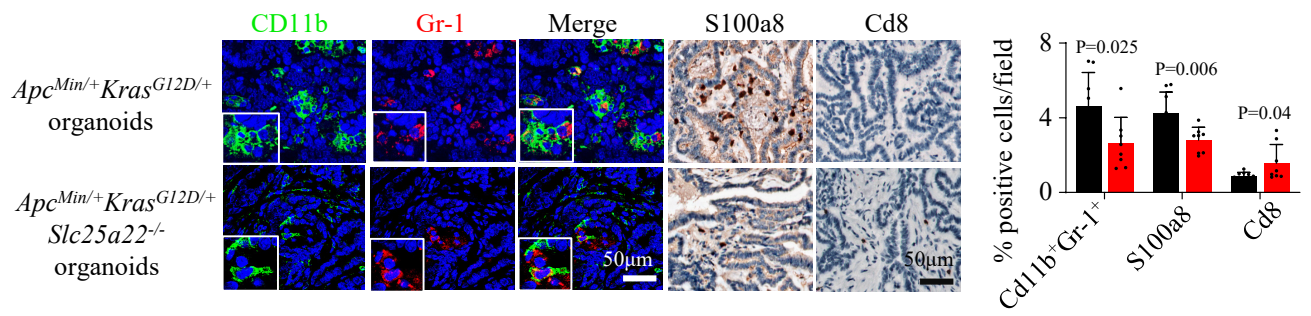

**Fig. S2. Immune cell infiltration in the APC-KRAS organoid allograft model.** Immunofluorescence staining and immunohistochemistry of markers of MDSC and CD8<sup>+</sup> T-cells in APC-KRAS organoid allografts (n=4). Data are presented as mean ± SD. Each dot represented the value from one capture field. Two-tailed Student's t-test. Source data are provided as a Source Data file.

Gating strategy of immune cell subsets in humanized-mice model

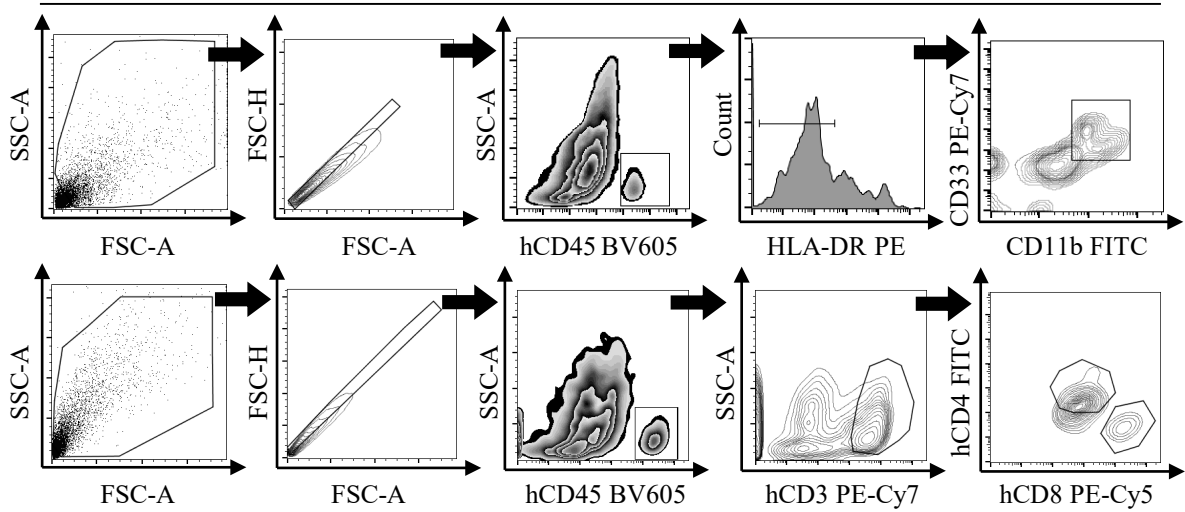

Gating strategy of immune cell subsets in immunocompetent mice model

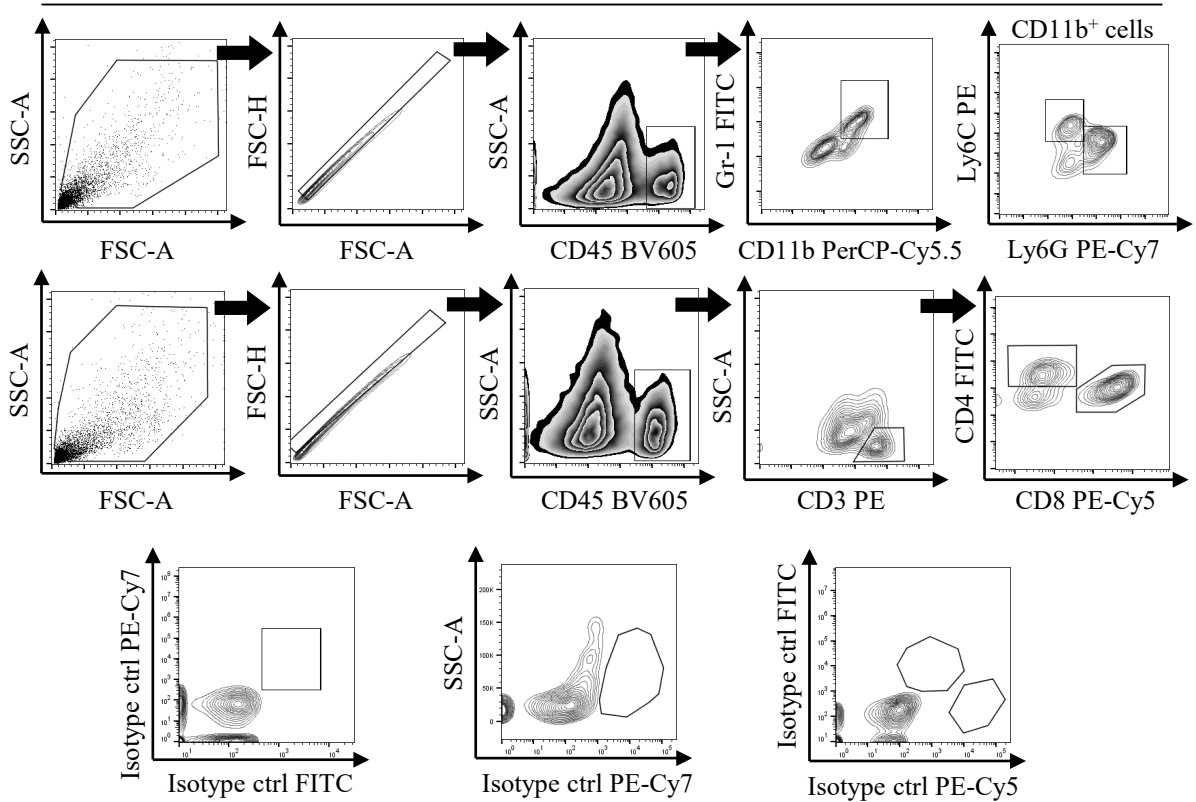

**Fig. S3. Gating strategy to identify the immune cell subsets in humanized and immunocompetent mice by flow cytometry.**

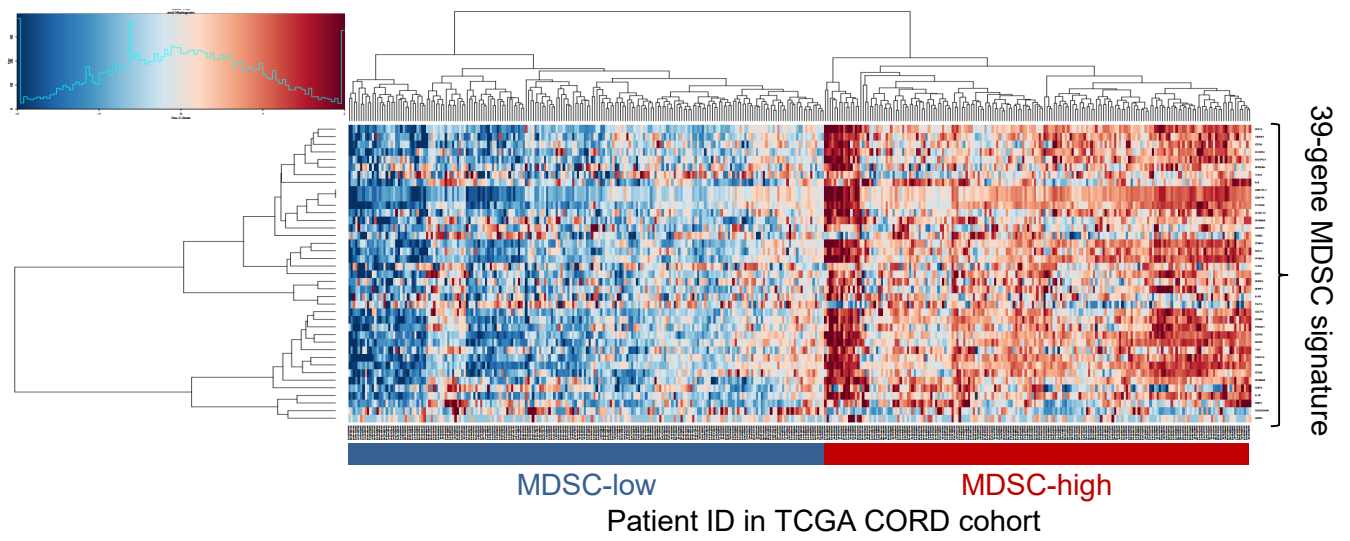

**Fig. S4. Analysis of MDSC infiltration based on RNA-seq dataset from TCGA.** TCGA CRC RNA-seq cohort was divided into MDSC-high (n=181) and MDSC-low CRC (n=202) based on the expression of 39 signature genes. Source data are provided as a Source Data file.

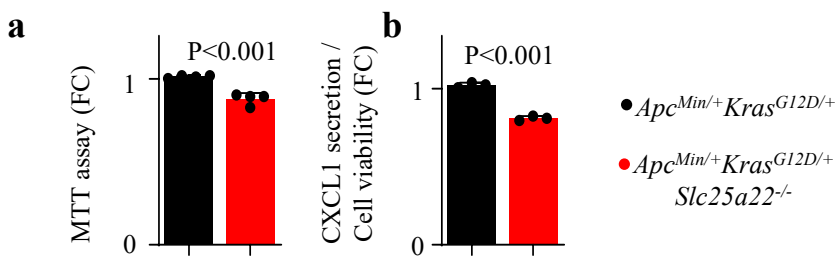

**Fig. S5. Effect of SLC25A22 knockout on cell viability and CXCL1 in APC-KRAS organoids. (a)** SLC25A22 knockout suppressed organoid growth (n=4). **(b)** SLC25A22 reduced CXCL1 secretion after normalization by cell viability (n=3). Each dot represents an independent sample. Data are presented as mean  $\pm$  SD **(a, b)**. Two-tailed Student's t-test **(a, b)**. Source data are provided as a Source Data file.

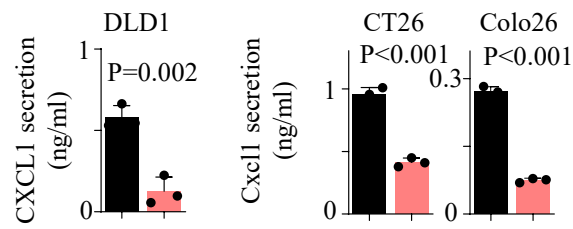

**Fig. S6. CXCL1 in KRAS-mutant CRC cells.** Validation of CXCL1 knockdown in DLD1 (n=3), CT26 (n=3) and Colo26 cells (n=3) by ELISA. Each dot represents an independent sample. Data are presented as mean  $\pm$  SD. Two-tailed Student's t-test. Source data are provided as a Source Data file.

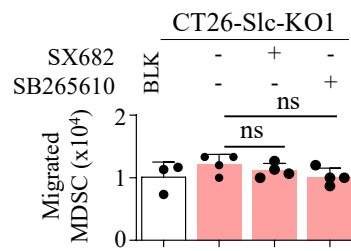

**Fig. S7. Effect of CXCR2 inhibitors on MDSC migration.** Co-incubation with SX682 (n=4) or SB265610 (n=4) with SLC25A22 knockout cells conditioned medium had no significant effect on MSDC migration in transwell assay. Each dot represents an independent sample. Data are presented as mean  $\pm$  SD. Two-tailed Student's t-test for two group comparison. ns, no significance. Source data are provided as a Source Data file.

**a Organoid allograft model**

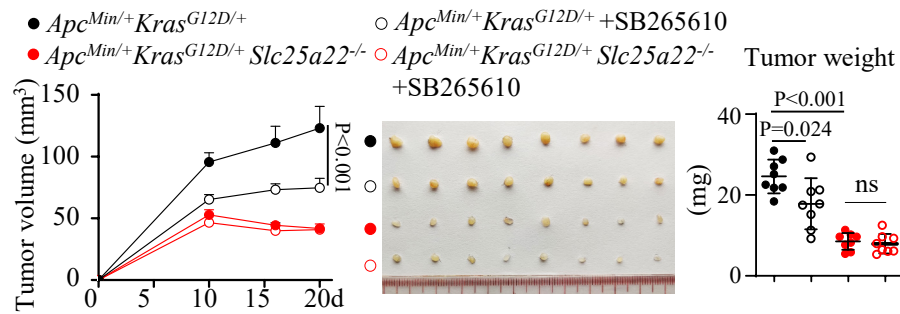

**b**

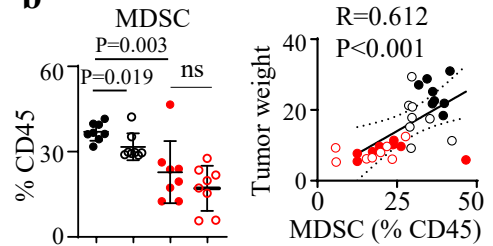

**Fig. S8. SLC25A22-mediated MDSC recruitment promotes KRAS-mutant CRC organoid allograft growth. (a)** SB265610 inhibited growth of *Apc<sup>Min/+</sup>Kras<sup>G12D/+</sup>* organoid allografts, but had no effect on *Apc<sup>Min/+</sup>Kras<sup>G12D/+</sup>Slc25a22<sup>-/-</sup>* organoid allografts in C57BL/6 mice (n=8). **(b)** SB265610 down-regulated MDSC in *Apc<sup>Min/+</sup>Kras<sup>G12D/+</sup>* organoid allografts. Tumoral MDSC positively correlated with tumor weight (n=8). Each dot represents an independent tumor. Data are presented as mean  $\pm$  SEM for growth curve **(A)** and  $\pm$  SD **(a, b)**. Two-tailed two-way ANOVA for growth curve comparison **(a)**. Two-tailed Student's t-test for two group comparison **(a, b)**. Two-tailed Pearson correlation test **(b)**. ns, no significance. Source data are provided as a Source Data file.



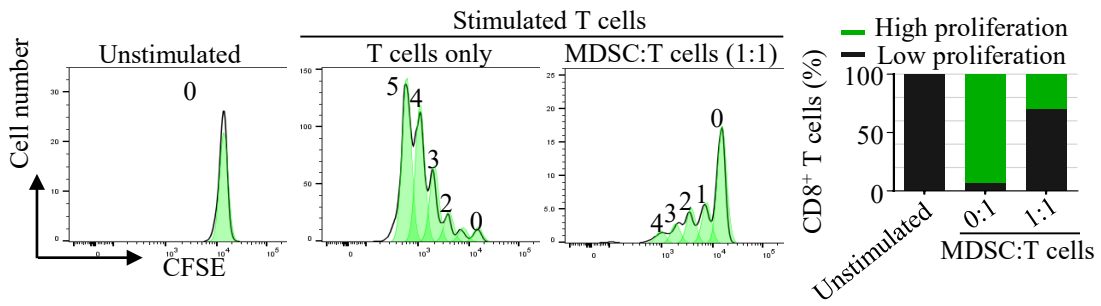

**Fig. S9. MDSC suppressed T cell proliferation in vitro.** Naïve T cells were harvested from mouse spleen and loaded with carboxyfluorescein diacetate (CFSE) fluorescence dye. MDSC and T cells are co-cultured in vitro in the presence of Dynabeads Mouse T-Activator CD3/CD28 (n=3). The number of proliferative cycles was determined by FlowJo software. Source data are provided as a Source Data file.

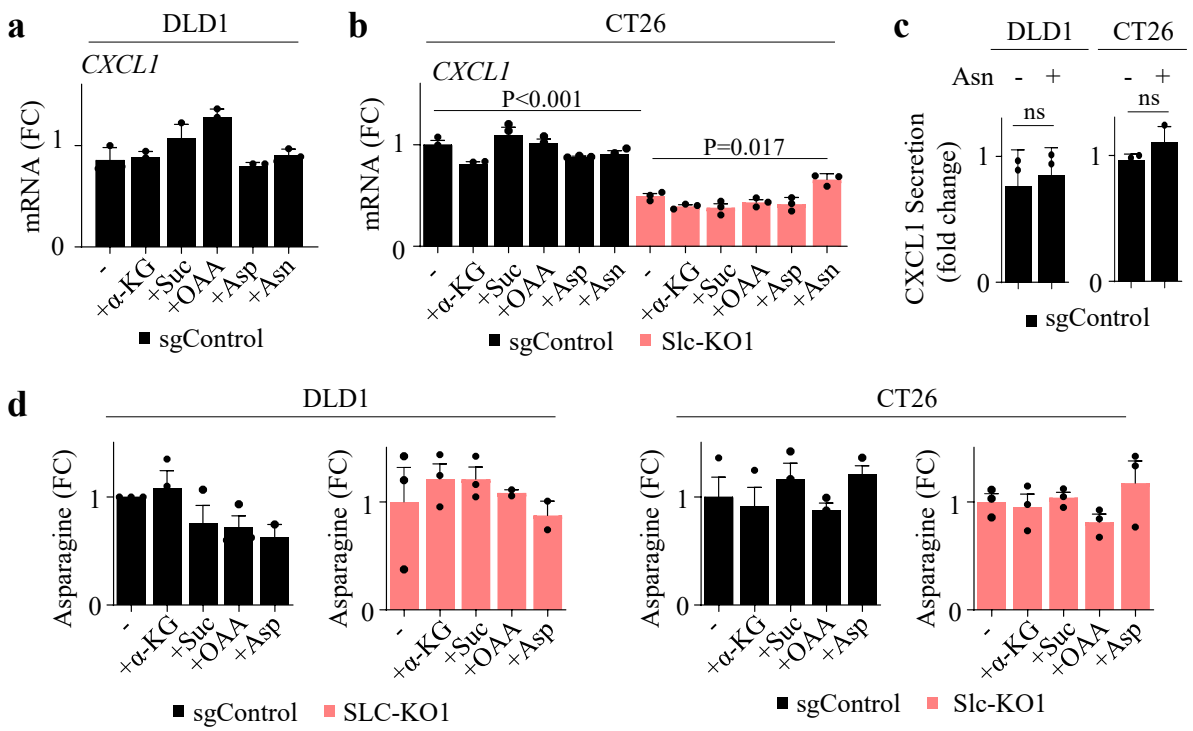

**Fig. S10. Effect of metabolites on CXCL1 and asparagine.** (a) Metabolites addition (2mM, 24h) had no effect on CXCL1 mRNA in DLD1-sgControl cells (n=3). (b) Asparagine (2mM, 24h) restored CXCL1 mRNA in CT26-Slc-KO cells, but had no effect on sgControl cells (n=3). (c) Asparagine (2mM, 24h) had no effect on secretion of CXCL1 in DLD1-sgControl and CT26-sgControl cells (n=3). (d) Addition of TCA cycle metabolites or aspartate (2mM, 24h) had no effect on intracellular levels of asparagine in DLD1 and CT26 cells (n=3). Each dot represents an independent sample. Data are presented as mean  $\pm$  SD (a-d). Two-tailed Student's t-test for two group comparison (a-d). ns, no significance. Source data are provided as a Source Data file.

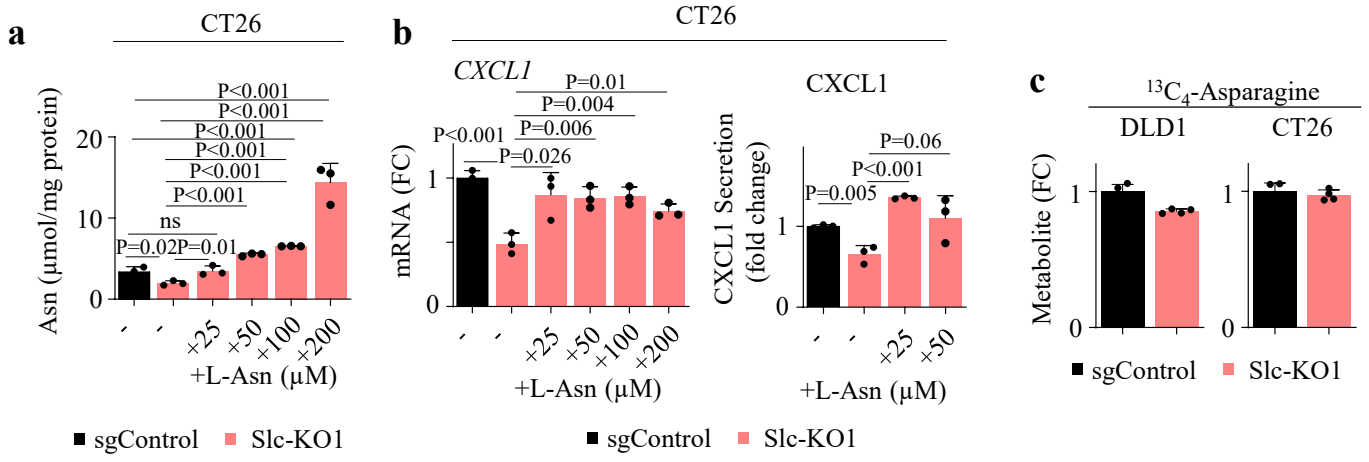

**Fig. S11. Low-dose asparagine restored CXCL1 expression.** (a) Titration of the asparagine dose required to restore intracellular asparagine in CT26 cells (n=3). (b) Low-dose asparagine (25μM, 24h) restored CXCL1 expression and secretion in CT26-Slc-KO cells (n=3). (c) Cells were treated with <sup>13</sup>C<sub>4</sub>-Aspartate (2mM, 96h) and their conversion to <sup>13</sup>C<sub>4</sub>-Asparagine was determined by LC-MS (n=4). Each dot represents an independent sample. Data are presented as mean ± SD (a-c). Two-tailed Student's t-test for two group comparison (a-c). ns, no significance. Source data are provided as a Source Data file.

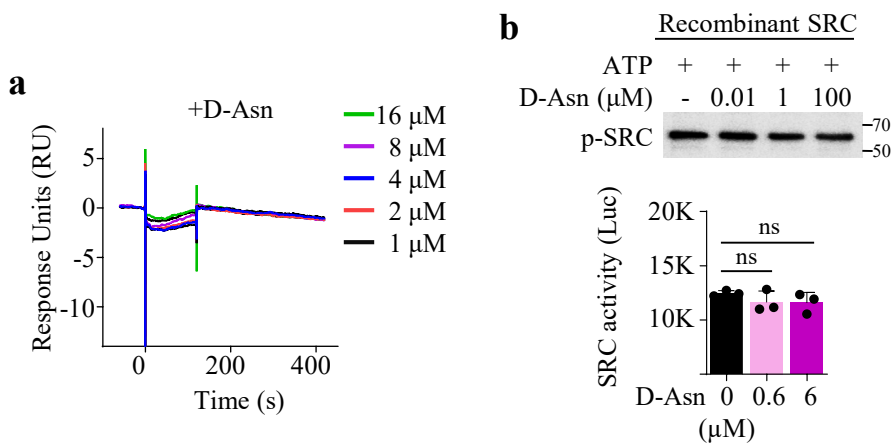

**Fig. S12. D-Asparagine failed to interact with SRC. (a)** BIAcore analysis revealed no binding of D-asparagine to recombinant SRC. **(b)** D-Asparagine had no effect on recombinant SRC phosphorylation and kinase activity (n=3). Each dot represents an independent sample. Data are presented as mean  $\pm$  SD. Two-tailed Student's t-test for two group comparison **(b)**. ns, no significance. Source data are provided as a Source Data file.

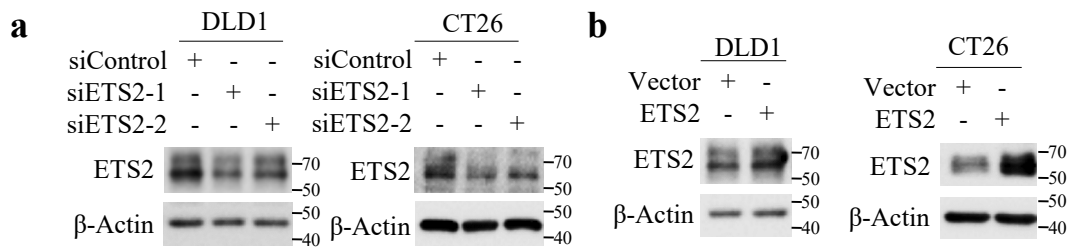

**Fig. S13. Validation of ETS2 knockdown and overexpression in KRAS-mutant CRC cells. (a)** siETS2 in DLD1 and CT26 cells. **(b)** Ectopic expression of ETS2 in DLD1 and CT26 cells. Experiments were repeated three times independently with similar results.

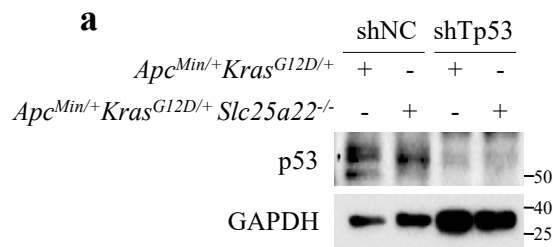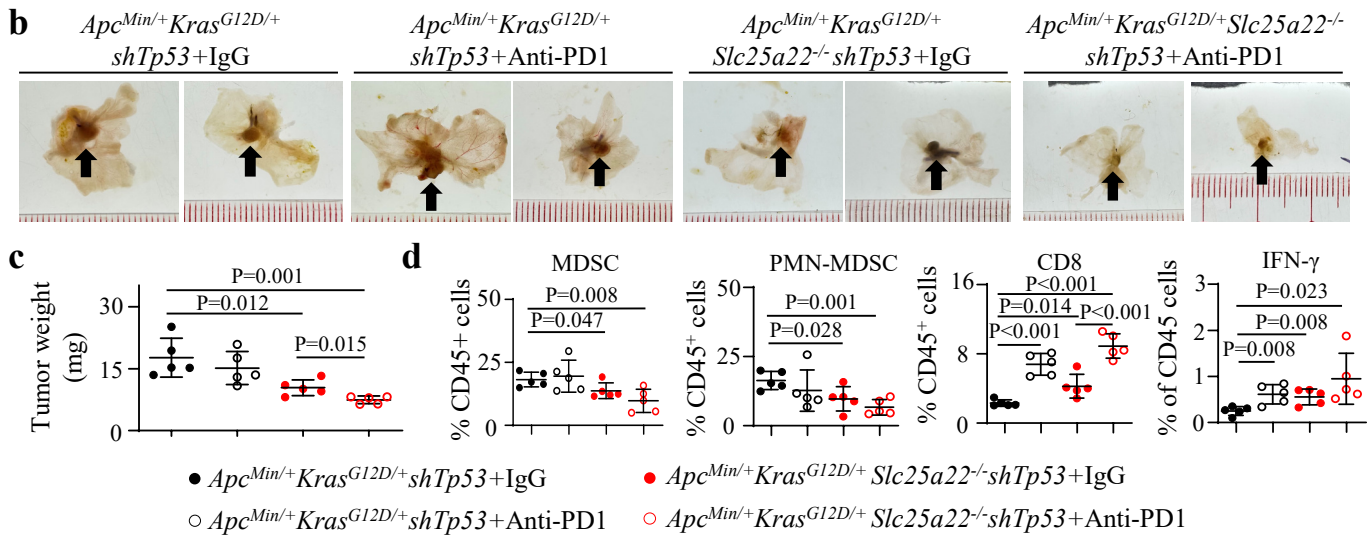

**Fig. S14. SLC25A22 knockout plus anti-PD1 synergistically inhibited tumor growth in an orthotopic model of APC-KRAS organoids with TP53 knockdown. (a)** shTp53 in *Apc<sup>Min/+</sup>Kras<sup>G12D/+</sup>* and *Apc<sup>Min/+</sup>Kras<sup>G12D/+</sup>Slc25a22<sup>-/-</sup>* organoids. **(b)** Representative images showing the orthotopic tumors from *Apc<sup>Min/+</sup>Kras<sup>G12D/+</sup>shTp53* and *Apc<sup>Min/+</sup>Kras<sup>G12D/+</sup>Slc25a22<sup>-/-</sup>shTp53* organoids implanted in C57BL/6 mice and treated with anti-PD1. **(c)** Tumor size in different groups (n=5). **(d)** Flow cytometry analysis of MDSC, PMN-MDSC, CD8<sup>+</sup> T-cells and IFN- $\gamma$ <sup>+</sup> CD8<sup>+</sup> T-cells in different groups (n=5). Each dot represents an independent tumor. Data are presented as mean  $\pm$  SD **(c, d)**. Two-tailed Student's t-test for two group comparison **(c, d)**. Source data are provided as a Source Data file.

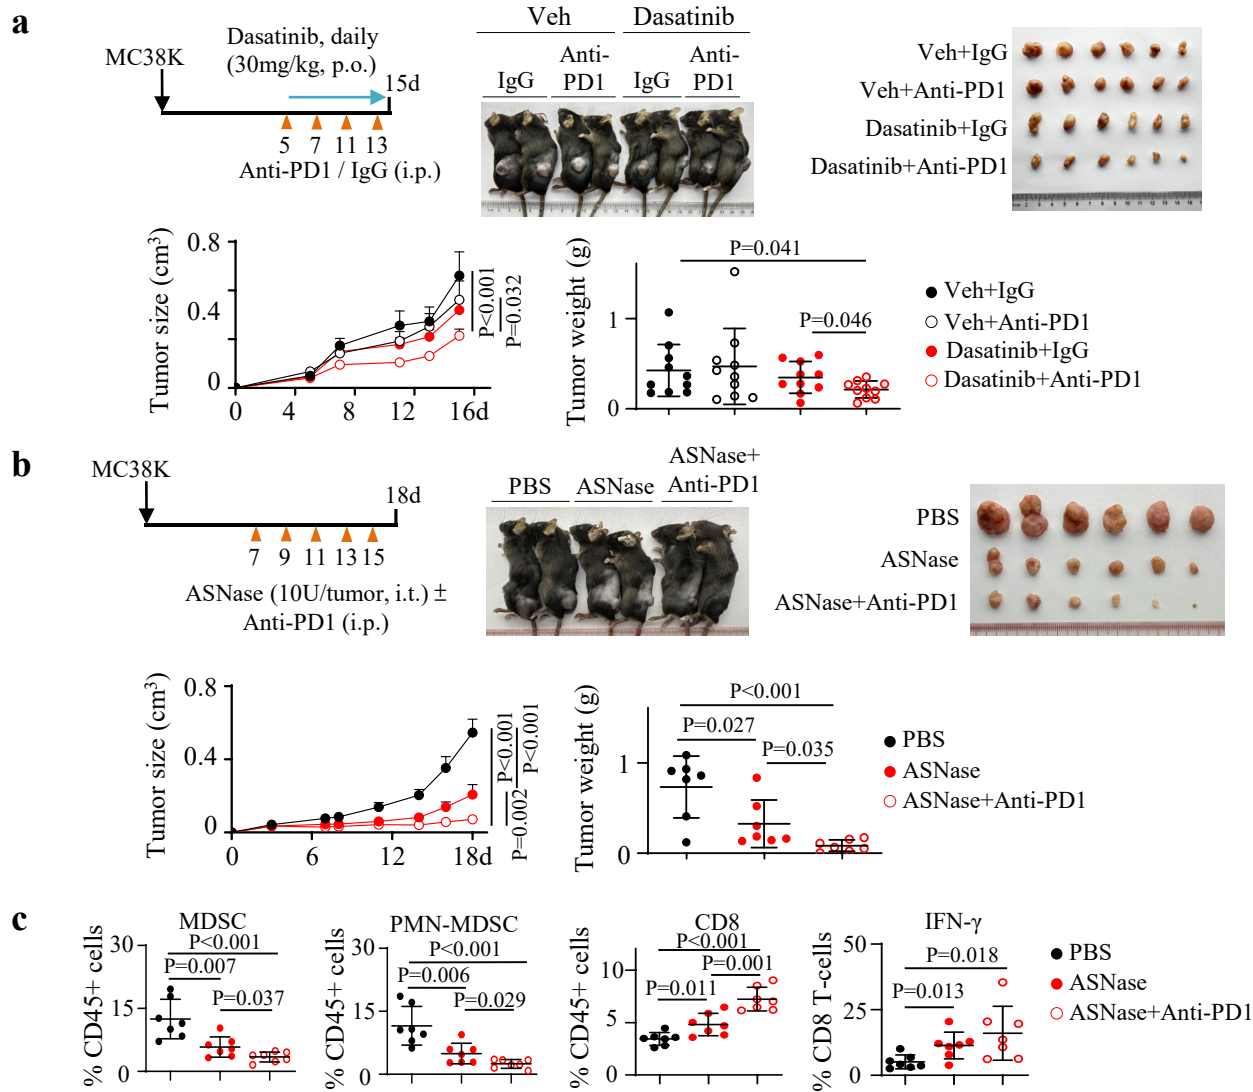

**Fig. S15. SRC inhibitor sensitized KRAS-mutant CRC to anti-PD1 treatment. (a)** Combination of Dasatinib plus anti-PD1 significantly inhibited growth of MC38K allografts, whilst single treatments were ineffective (n=10). **(b)** Combined Asparaginase plus anti-PD1 suppressed the growth of MC38K allografts, and was more effective than single treatment (n=7). **(c)** Flow cytometry analysis of MDSC, PMN-MDSC, CD8<sup>+</sup> T-cells and IFN- $\gamma$ <sup>+</sup>CD8<sup>+</sup> T-cells in different groups (n=7). Each dot represents an independent tumor. Data are presented as mean  $\pm$  SEM for growth curve (**a, b**) and  $\pm$  SD (**a-c**). Two-tailed two-way ANOVA for growth curve comparison (**a-b**). Two-tailed Student's t-test for two group comparison (**a-c**). Source data are provided as a Source Data file.

**Table S1: Primers of Chip-PCR**

| Primer set  | Sequence                 |
|-------------|--------------------------|
| #1-F:       | CCAGTACCCCTGAGTAACCGA    |
| #1-R:       | CTGCTACCCAACCTACCCCTAATG |
| #2-F:       | ACAGGTCTTACCTATTGAGCTGG  |
| #2-R:       | GACATGGAGTAAGATGGGAGGAG  |
| #3-F:       | AGAGAGCTCTGAATCCCCTTG    |
| #3-R:       | ACACACACATGTTGTTTTCTCTCA |
| #4-F:       | TCTCTAGAAAGGGGGCCCAATA   |
| #4-R:       | CGGATGAAATAGGAACGCCG     |
| #5-F:       | GCATGTCTGCTGCTTCAGTG     |
| #5-R:       | GGCTCACCATTCCTGGTTCT     |
| #6-F:       | AGGGAAGAAGGAAGATAAGCAGG  |
| #6-R:       | CCAGTGTTAGCGTCAGTGGA     |
| #7-F:       | CCACAGGAGTTACTCTGAAGGG   |
| #7-R:       | ATCCCGAGTCCGGAAGGA       |
| Negative-F: | AATCCGAGACACAACGCTCTT    |
| Negative-R: | GCCTGCGCTGAAGATACCA      |



**Table S2: Antibody for flow cytometry**

| Specificities | Target        | Brand     | Fluorescein      | Clone    | Catalog number | Dilution |
|---------------|---------------|-----------|------------------|----------|----------------|----------|
| Human         | CD45          | Biologend | BV605            | HI30     | 304042         | 1:100    |
| Human         | CD3           | Biologend | PE               | OKT3     | 317308         | 1:100    |
| Human         | CD4           | Biologend | FITC             | A161A1   | 357405         | 1:100    |
| Human         | CD8           | Biologend | PE/Cyanine5      | SK1      | 344770         | 1:100    |
| Human         | MHC-II        | Biologend | PE               | LN3      | 327007         | 1:100    |
| Human         | CD11b         | Biologend | FITC             | ICRF44   | 301330         | 1:100    |
| Human         | CD33          | Biologend | PE/Cyanine7      | P67.6    | 366618         | 1:100    |
| Mouse         | CD45          | Biologend | BV605            | 30-F11   | 103140         | 1:100    |
| Mouse         | CD3           | Biologend | PE               | 17A2     | 100206         | 1:100    |
| Mouse         | CD4           | Biologend | FITC             | RM4-5    | 100509         | 1:100    |
| Mouse         | CD8           | Biologend | BV421            | 53-6.7   | 100738         | 1:100    |
| Mouse         | IFN- $\gamma$ | Biologend | FITC             | XMG1.2   | 505806         | 1:100    |
| Mouse         | TNF- $\alpha$ | Biologend | PE/Cyanine7      | MP6-XT22 | 506324         | 1:100    |
| Mouse         | Granzyme B    | Biologend | PerCP/Cyanine5.5 | QA16A02  | 372212         | 1:100    |
| Mouse         | CD11b         | Biologend | PerCP/Cyanine5.5 | M1/70    | 101228         | 1:100    |
| Mouse         | Ly-6G/Ly-6C   | Biologend | FITC             | RB6-8C5  | 108406         | 1:100    |
| Mouse         | Ly-6G         | Biologend | PE/Cyanine7      | 1A8      | 127618         | 1:100    |
| Mouse         | Ly-6C         | Biologend | PE               | HK1.4    | 128008         | 1:100    |
| Mouse         | CD274         | Biologend | BV711            | 10F.9G2  | 124319         | 1:100    |
| Mouse         | CD11c         | Biologend | PE               | N418     | 117308         | 1:100    |
| Mouse         | CD206         | Biologend | BV421            | C068C2   | 141717         | 1:100    |
| Mouse         | F4/80         | Biologend | FITC             | BM8      | 123108         | 1:100    |

**Table S3: Primers for RT-qPCR.**

| Species | Gene         | sequence                 |
|---------|--------------|--------------------------|
| Human   | CXCL1-F      | AGCTTGCCTCAATCCTGCATCC   |
| Human   | CXCL1-R      | TCCTTCAGGAACAGCCACCAGT   |
| Human   | CXCL3-F      | TTCACCTCAAGAACATCCAAAGTG |
| Human   | CXCL3-R      | TTCTTCCCATTCTTGAGTGTGGC  |
| Human   | ETS2-F       | CCCCTCGGTCGTGCG          |
| Human   | ETS2-R       | CAGCAAACAGGGACCCATCAA    |
| Human   | CEBPB-F      | GCAACCCACGTGTAAGTGTGTC   |
| Human   | CEBPB-R      | GCCCCAAAAGGCTTTGTAAC     |
| Human   | JunB-F       | AAGGGACACGCCTTCTGAAC     |
| Human   | JunB-R       | AAACGTCGAGGTGGAAGGAC     |
| Human   | JunD-F       | ATGATGAAGAAGGACGCGCT     |
| Human   | JunD-R       | TTGGACTGGATGATGAGGCG     |
| Human   | beta-actin-F | CTCACCATGGATGATGATATCGC  |
| Human   | beta-actin-R | GGAATCCTTCTGACCCATGCC    |
| Mouse   | CXCL1-F      | TCCAGAGCTTGAAGGTGTTGCC   |
| Mouse   | CXCL1-R      | AACCAAGGGAGCTTCAGGGTCA   |
| Mouse   | CXCL3-F      | TGAGACCATCCAGAGCTTGACG   |
| Mouse   | CXCL3-R      | CCTTGGGGGTTGAGGCAAACCT   |
| Mouse   | ETS2-F       | ATGCTGTGTAACCTCGGCAA     |
| Mouse   | ETS2-R       | CTGTTCCATGCTGAAGCCTAATG  |
| Mouse   | CEBPB-F      | GCTGAGCGACGAGTACAAGAT    |
| Mouse   | CEBPB-R      | CAGCTGCTTGAACAAGTTCCG    |
| Mouse   | ETS2-F       | ATGCTGTGTAACCTCGGCAA     |
| Mouse   | ETS2-R       | CTGTTCCATGCTGAAGCCTAATG  |
| Mouse   | JunB-F       | GTCTCCTACGGGAGCAAGTG     |
| Mouse   | JunB-R       | GGAGTCCAGTGTGTGAGCTG     |
| Mouse   | JunD-F       | TACGCAGTTCCTCTACCCGA     |
| Mouse   | JunD-R       | AAACTGCTCAGGTTGGCGTA     |
| Mouse   | Arg1-F       | CCTTTCTCAAAGGACAGCCTC    |
| Mouse   | Arg1-R       | CAGACCGTGGGTTCTTCACA     |
| Mouse   | INOS-F       | TCTAGTGAAGCAAAGCCCAACA   |
| Mouse   | INOS-R       | CTCTCCACTGCCCCAGTTTT     |
| Mouse   | PDL1-F       | CCTCGCCTGCAGATAGTTCC     |
| Mouse   | PDL1-R       | CCCAGTACACCACTAACGCA     |
| Mouse   | beta-actin-F | GGTACCACCATGTACCAGG      |
| Mouse   | beta-actin-R | AAAACGCAGCTCAGTAACAGTC   |

**Table S4: The sequence of sgRNA targeting SLC25A22**

| Species | Gene     | sequence                      |
|---------|----------|-------------------------------|
| Mouse   | SLC25A22 | sgRNA-1: ATACATGCCGAAGTAGCCCT |
| Mouse   | SLC25A22 | sgRNA-2: CCCGGAGAAGGCCATCAAGT |

**Table S5: Antibody for Western blot**

| Target                                       | Brand          | Catalog number     |
|----------------------------------------------|----------------|--------------------|
| SLC25A22                                     | Sigma-Aldrich  | HPA014662 (1:2000) |
| ETS2                                         | Invitrogen     | PA5-28053 (1:1000) |
| Phospho-ETS2                                 | Invitrogen     | 44-1105G (1:700)   |
| Lamin A/C                                    | Cell signaling | 4777 (1:3000)      |
| ASNS                                         | Abclonal       | A1030 (1:1000)     |
| Anti-Src antibody [GD11]                     | Abcam          | ab231081 (1:5000)  |
| Anti-Src (phospho Y419) antibody [EPR17734]  | Abcam          | ab185617 (1:1000)  |
| p44/42 MAPK (Erk1/2)                         | Cell signaling | 9102 (1:1000)      |
| Phospho-p44/42 MAPK (Erk1/2) (Thr202/Tyr204) | Cell signaling | 9101 (1:1000)      |
| GAPDH                                        | Cell signaling | 5174 (1:2000)      |
| $\beta$ -actin                               | Cell signaling | 4970 (1:2000)      |

**Table S6: siRNA**

| Gene      | Species | Brand      | Catalog number |
|-----------|---------|------------|----------------|
| siCXCL1-1 | Human   | Invitrogen | s6215          |
| siCXCL1-2 | Human   | Invitrogen | s6216          |
| siCXCL3-1 | Human   | Invitrogen | s6221          |
| siCXCL3-2 | Human   | Invitrogen | s6223          |
| siASNS-1  | Human   | Invitrogen | s533751        |
| siASNS-2  | Human   | Invitrogen | s533753        |
| siETS2-1  | Human   | Invitrogen | 115625         |
| siETS2-2  | Human   | Invitrogen | 146636         |
| siCXCL1-1 | Mouse   | Invitrogen | s67077         |
| siCXCL1-2 | Mouse   | Invitrogen | s67078         |
| siASNS-1  | Mouse   | Invitrogen | s77506         |
| siASNS-2  | Mouse   | Invitrogen | s77504         |
| siETS2-1  | Mouse   | Invitrogen | 187766         |
| siETS2-2  | Mouse   | Invitrogen | 187767         |
